# Supplementary material for: Subclinical inflammation on MRI of hand and foot of anticitrullinated peptide antibody–negative arthralgia patients at risk for rheumatoid arthritis
Source: PubMed Central journal article supplement (PMC4060237; doi:10.1186/ar4536), 2014-04-10

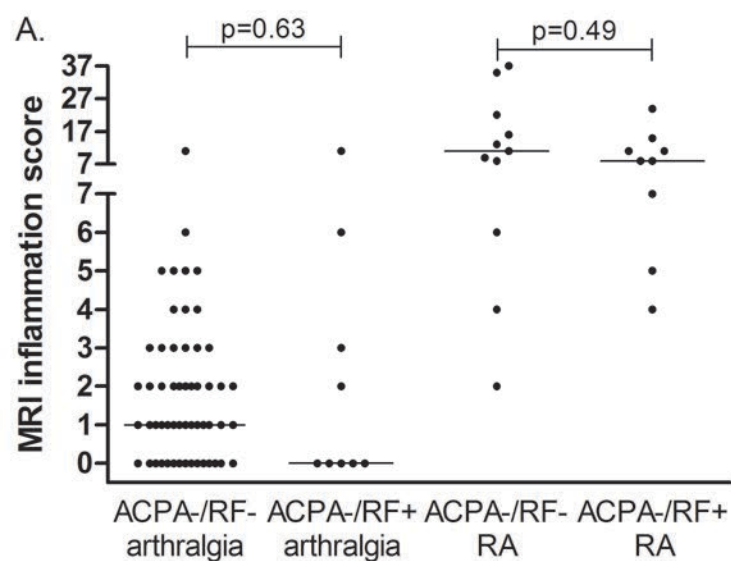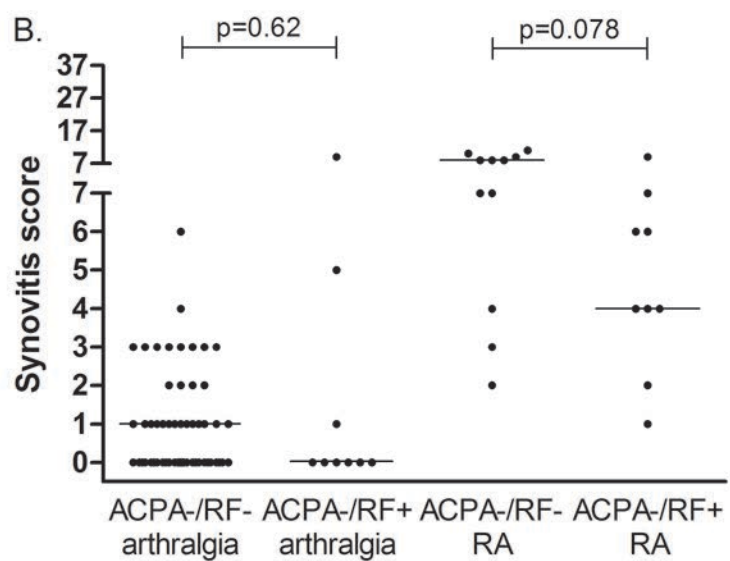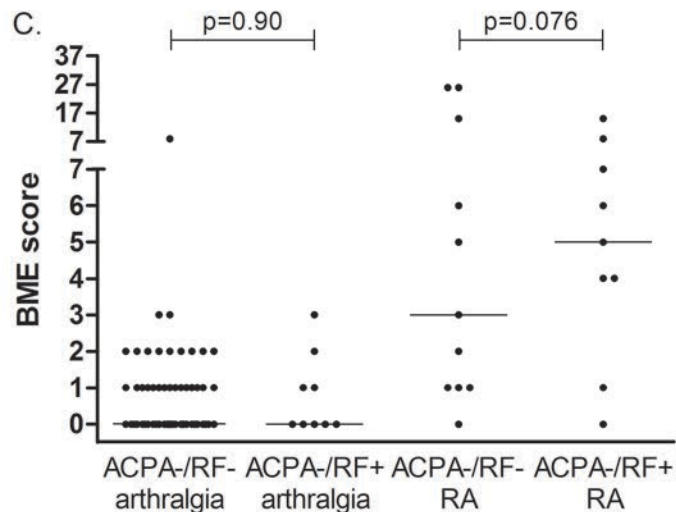

Supplement: ar4536-S1.pdf [file ar4536-S1.pdf]
